# Supplementary material for: Radiosensitisation of human colorectal cancer cells by ruthenium(II) arene anticancer complexes
Source: PubMed Central journal article supplement (PMC4751532; doi:10.1038/srep20596), 2016-02-12
Supplement: srep20596-s1.pdf [file srep20596-s1.pdf]

## **Radiosensitisation of human colorectal cancer cells by ruthenium(II) arene anticancer complexes**

**Supplementary Figures S1a – S3.**

**Supplementary Table S1**

R Carter<sup>(1)</sup>, A Westhorpe<sup>(1)</sup>, MJ Romero<sup>(2)</sup>, A Habtemariam<sup>(2)</sup>, CR Gallevo<sup>(1)</sup>, Y Bark<sup>(1)</sup>, N Menezes<sup>(1)</sup>, PJ Sadler<sup>(2)\*</sup>, RA Sharma<sup>(1)\*</sup>

<sup>(1)</sup> CRUK-MRC Oxford Institute for Radiation Oncology, University of Oxford

<sup>(2)</sup> Department of Chemistry, University of Warwick

\* Correspondence to RA Sharma or PJ Sadler

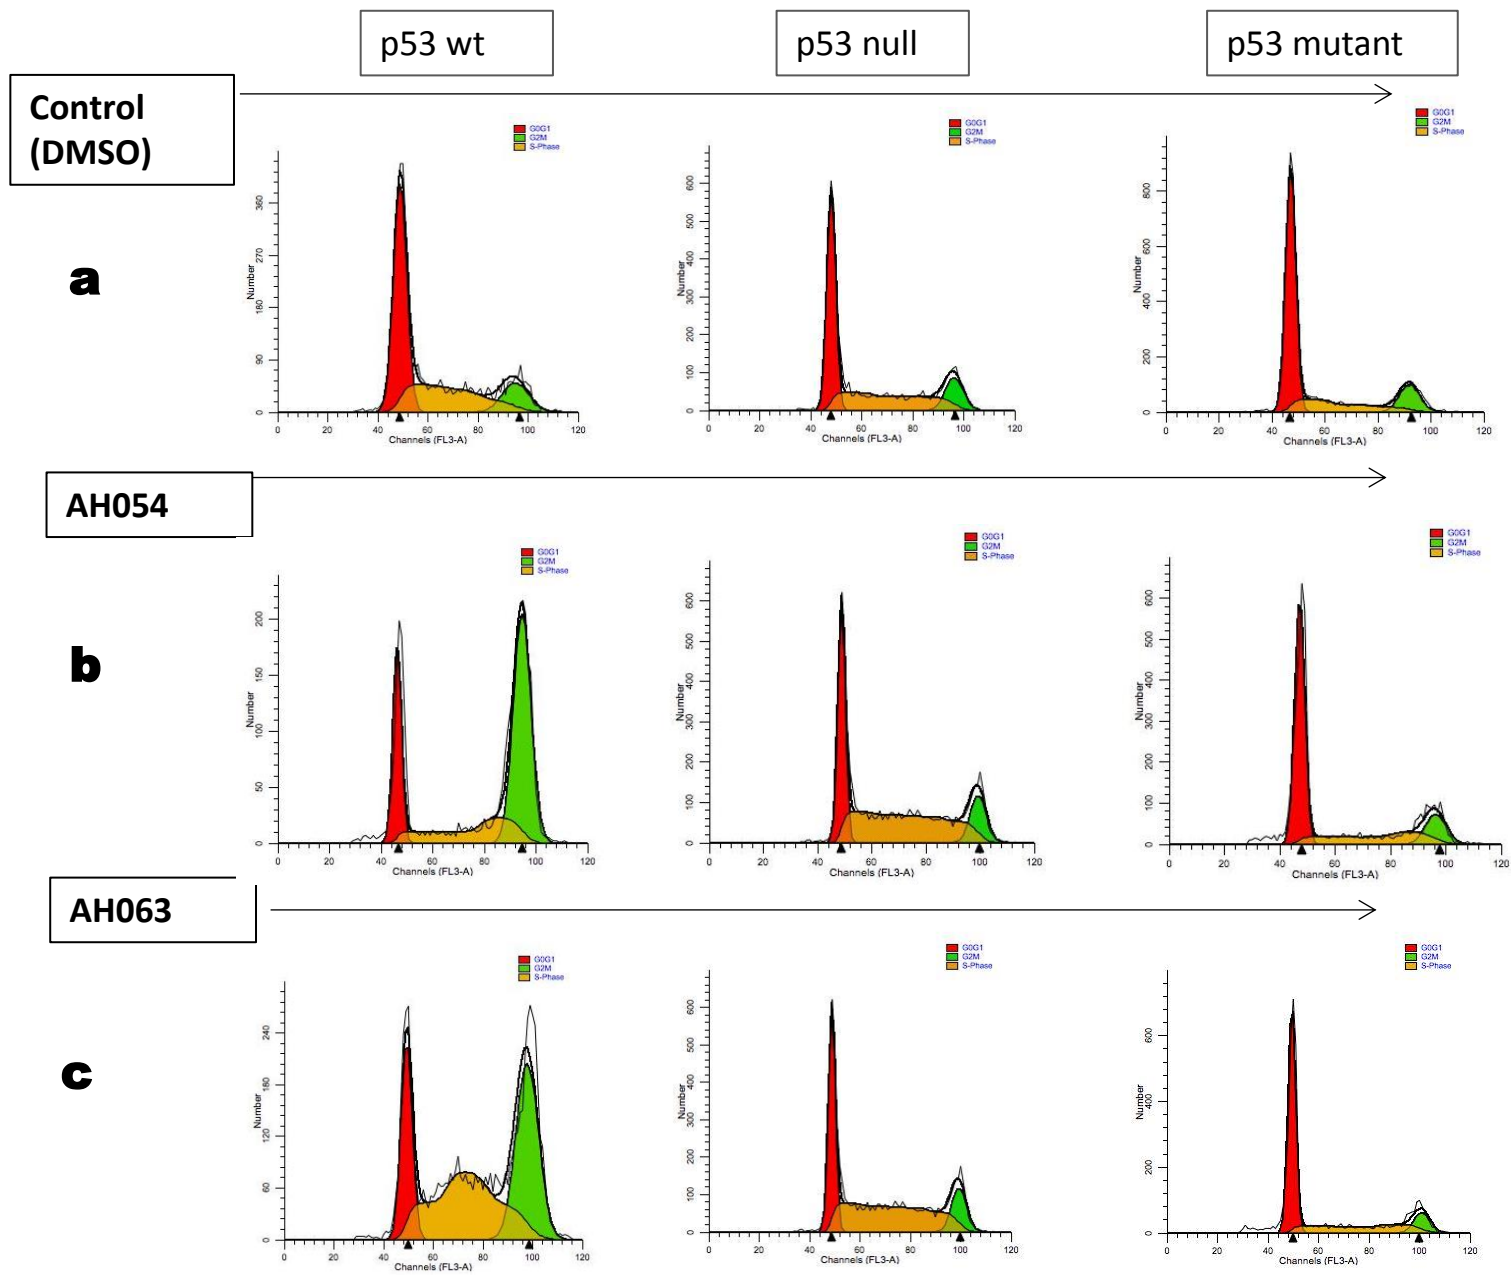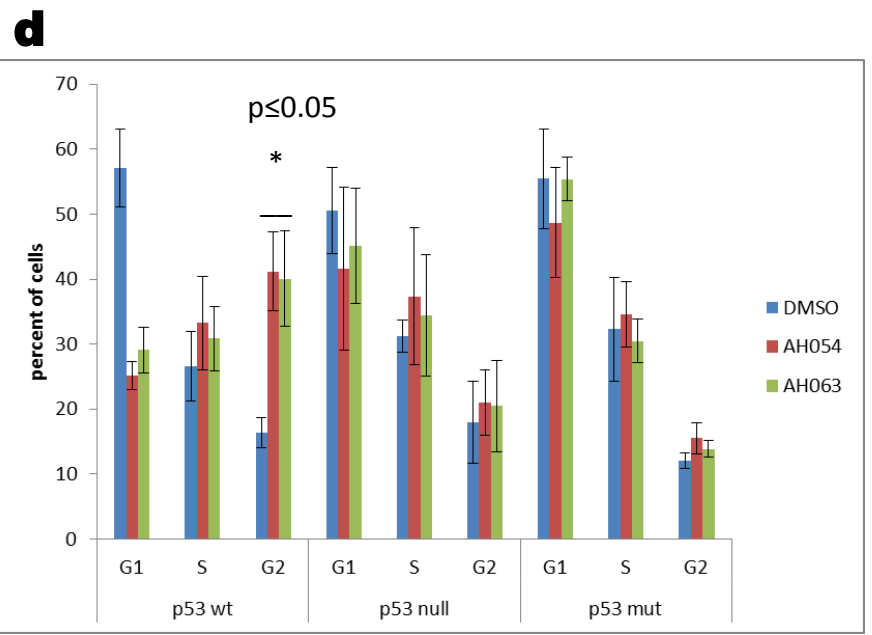

**Supplementary Figure S1a:** Representative FACS profiles for HCT116 cells treated for 24 hours with drug at IC80 concentration show G2/M arrest occurs only in p53 wildtype cells. (a) DMSO controls, (b) AH54 treatment, (c) AH63 treatment, (d) Mean FACS data from 3 independent experiments; asterisk indicates significance ( $p \leq 0.05$  by unpaired students T test).

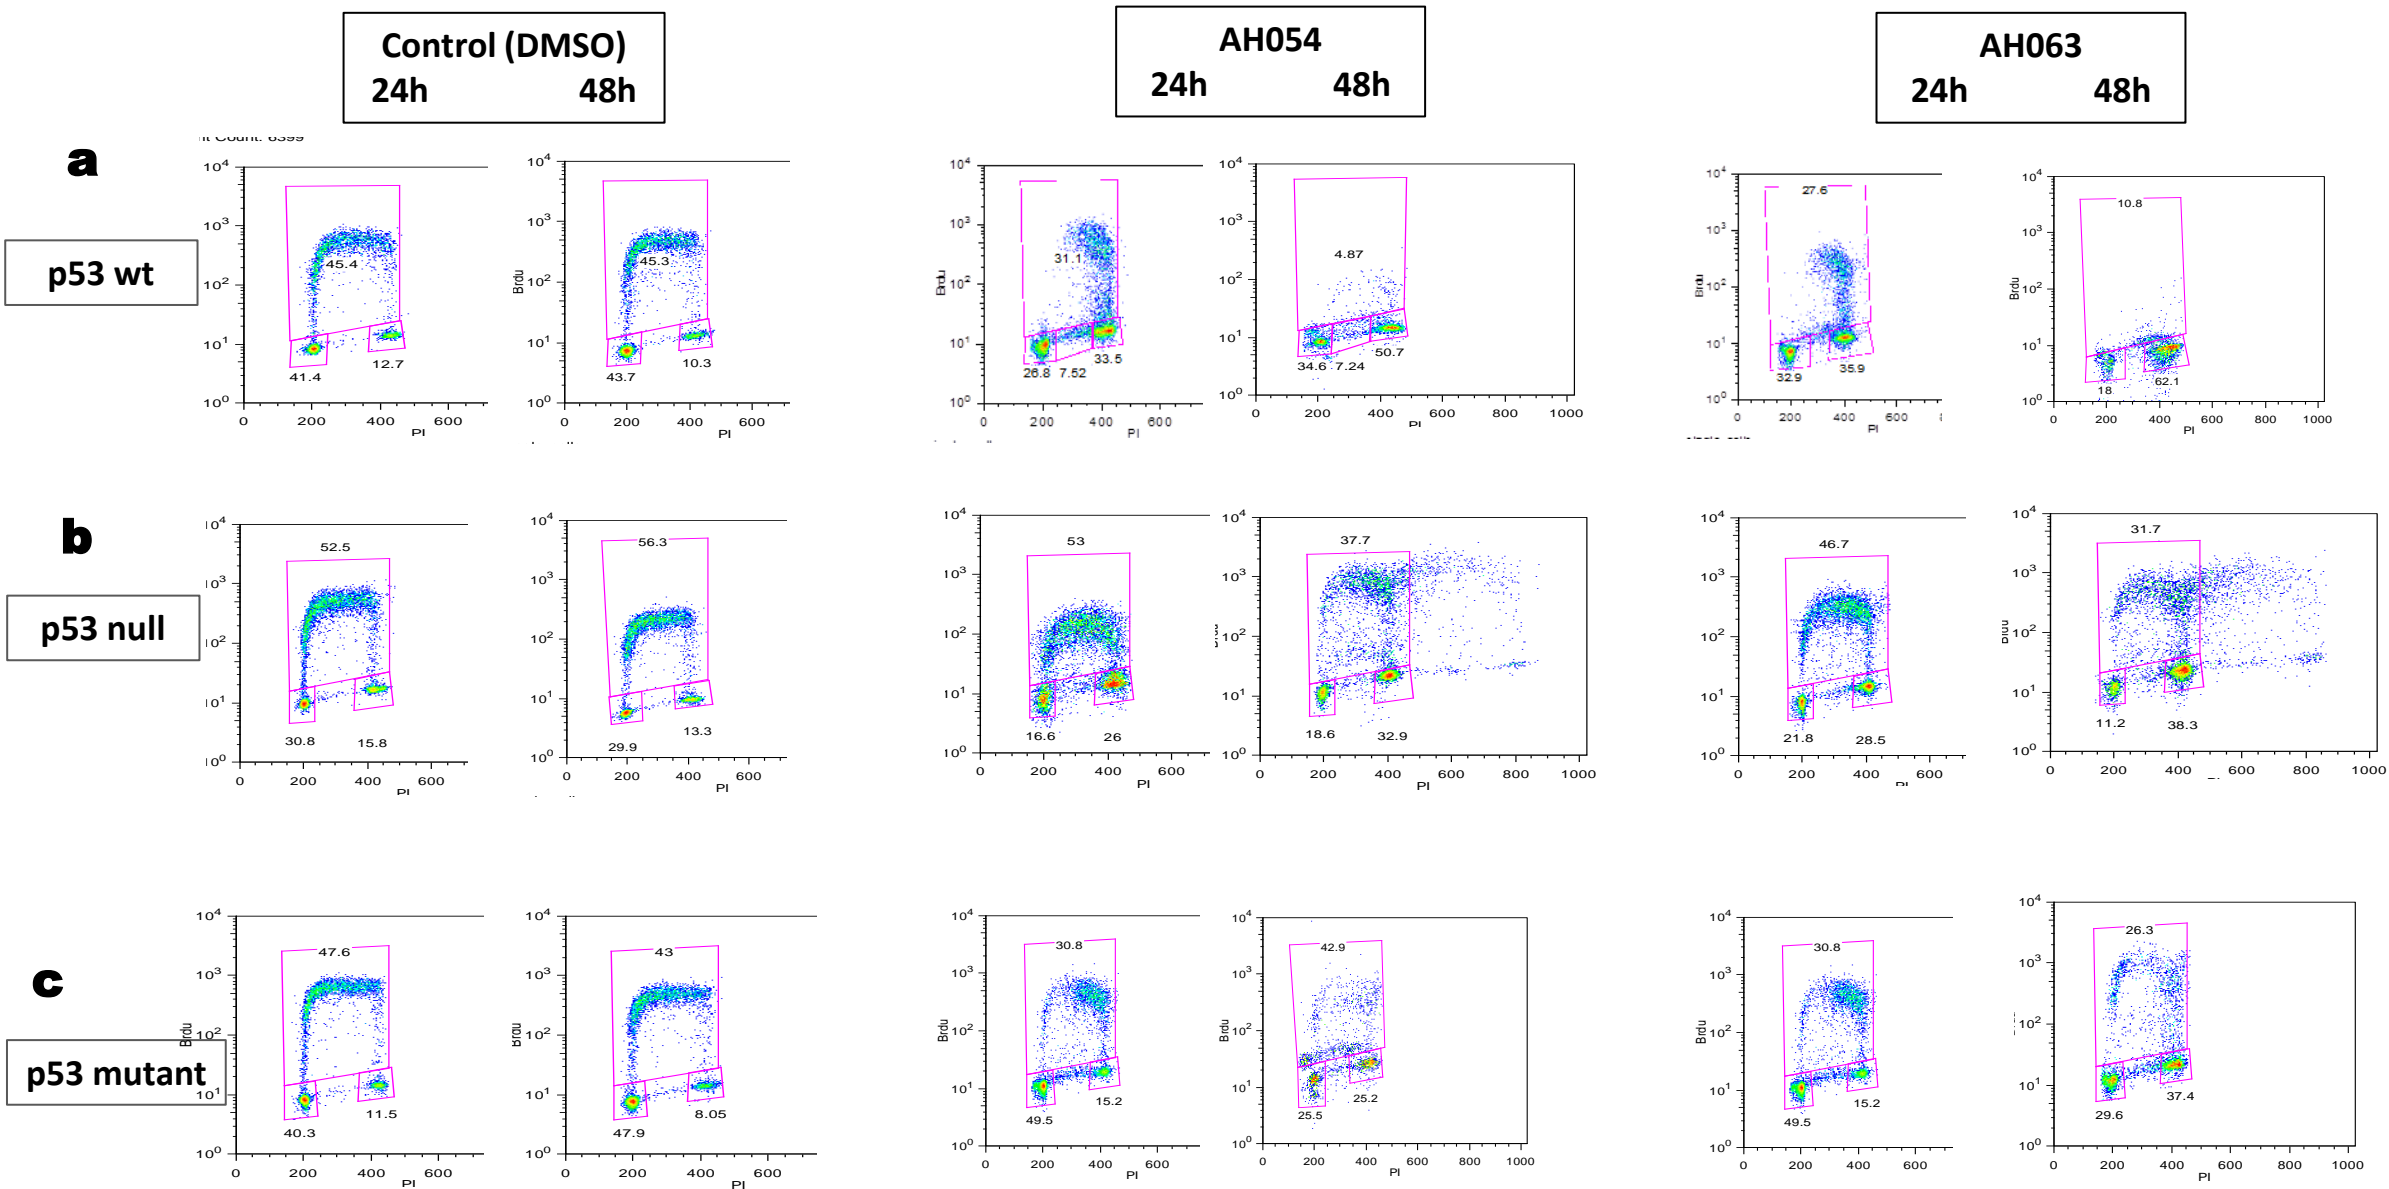

**Supplementary Figure S1b:** Representative FACS profiles for HCT116 cells treated with drug at IC80 concentration show G2/M arrest occurs only in p53 wildtype cells. (a) p53 wildtype, (b) p53 null, (c) p53 mutated.

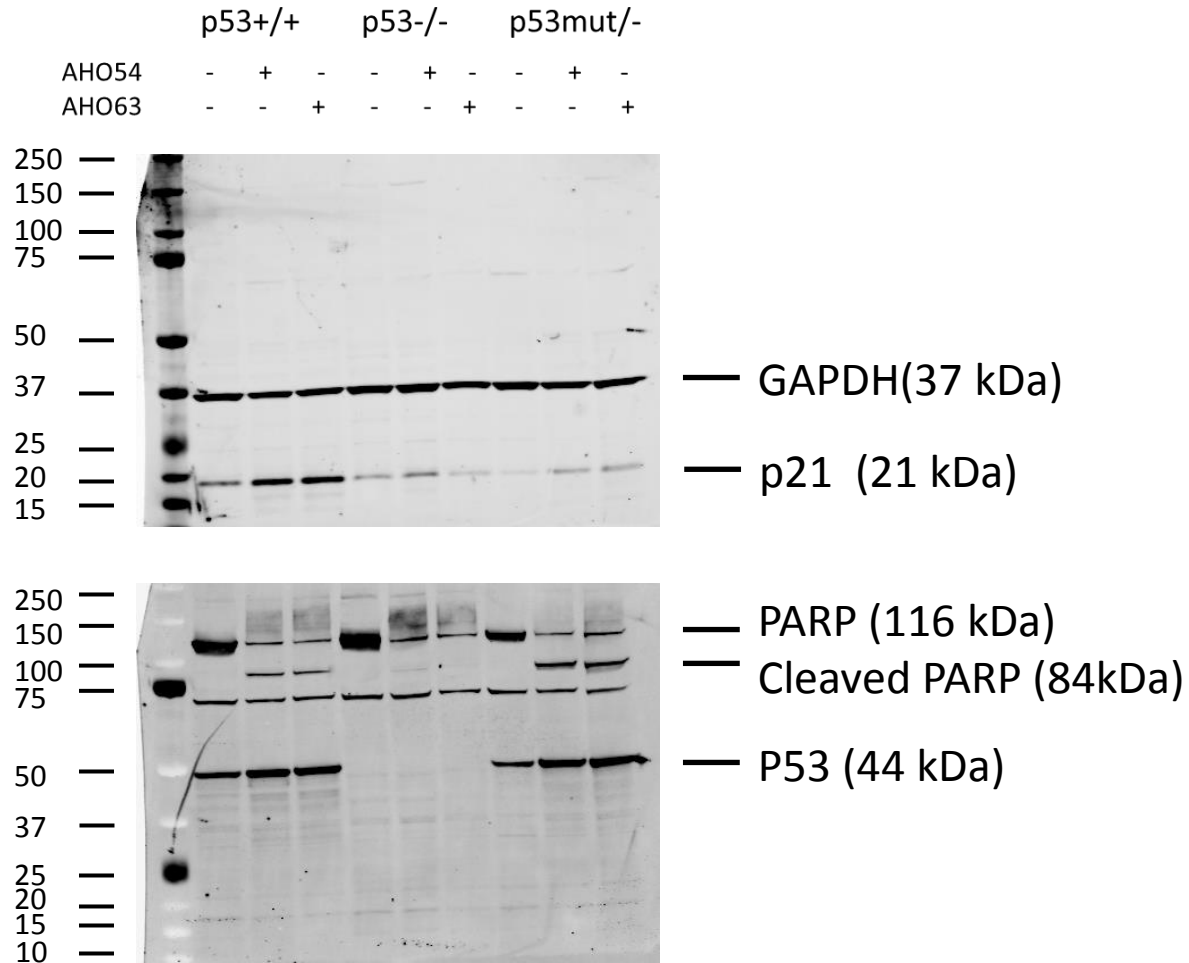

Supplementary Figure S2: Full pictures of Western blot cropped to form figure 5c. Upper panel shows rabbit primary antibodies to p21 and GAPDH, detected with Alexa Fluor® 680 conjugated goat anti-rabbit antibody. Lower panel shows the same blot with mouse primary antibodies to p53 and PARP, detected with Alexa Fluor® 790 conjugated goat anti-mouse antibody. Marker is Biorad Dual Colour prestained protein standard.

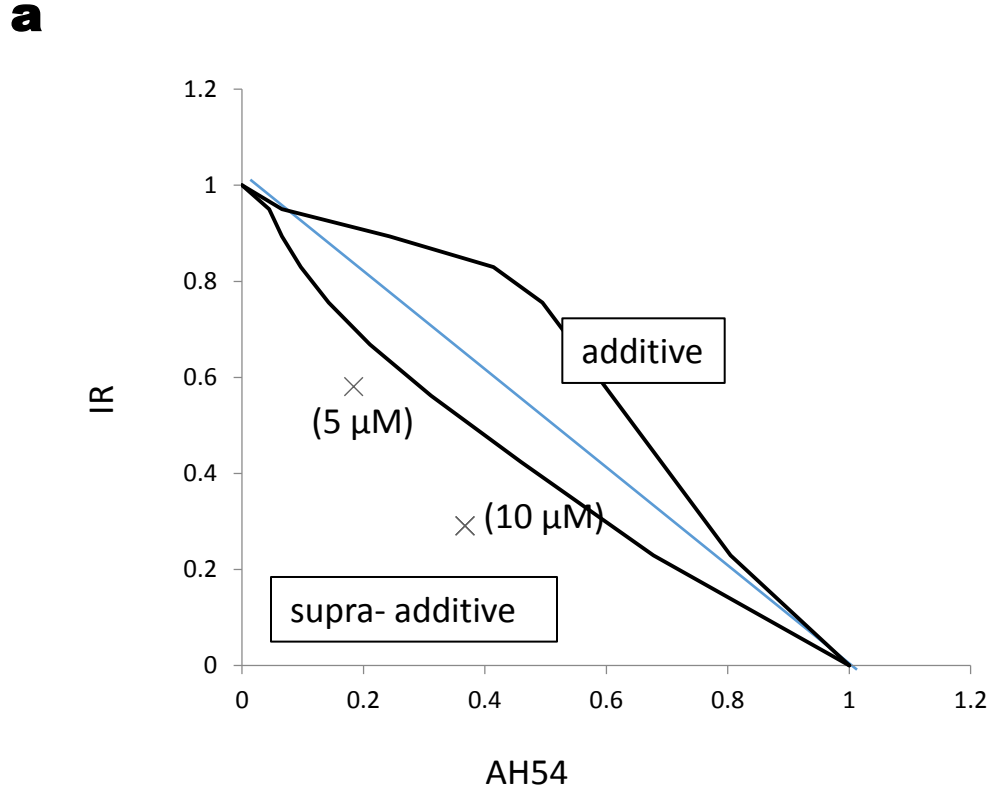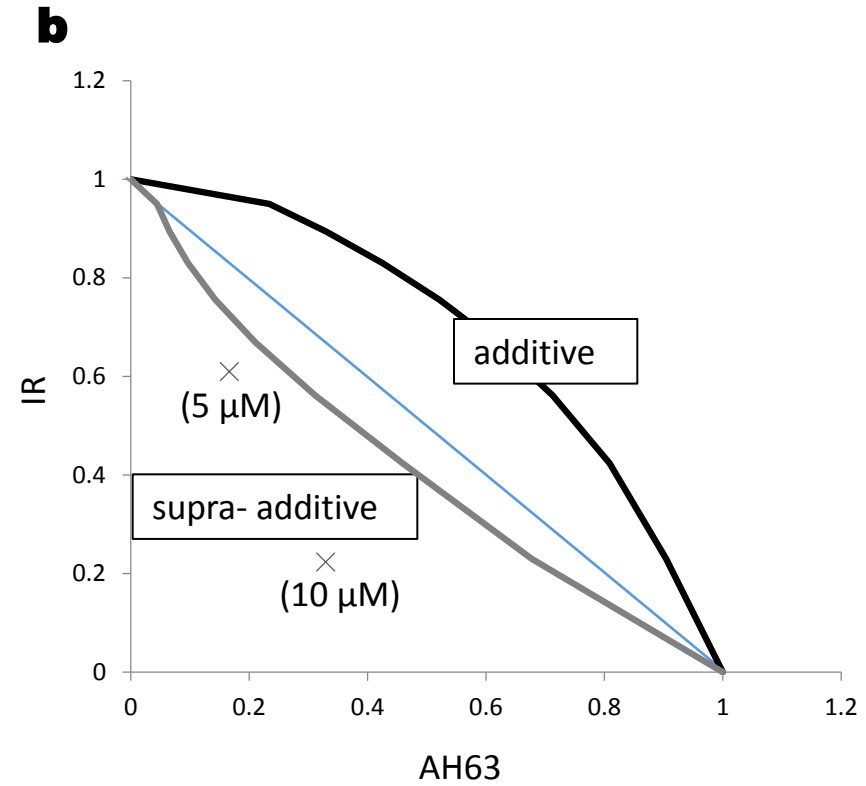

Supplementary Figure S3: Isobolograms indicating theoretical envelope of additivity (at SF 0.1) for p53 -wildtype HCT116 cells treated with combinations of ruthenium compounds and ionising radiation. Experimental data points (x) indicate clonogenic data (surviving fraction 0.1) for 5  $\mu\text{M}$  or 10  $\mu\text{M}$  ruthenium compound combined with radiation. The data points are all in the supra-additive region on chart (A) for AH54 and chart (B) for AH63.

| Complex Code | Structure | Complex Code | Structure |
|--------------|-----------|--------------|-----------|
| AH12         |           | AH82         |           |
| AH54         |           | AH108        |           |
| AH63         |           | TB10         |           |
| AH65         |           | HC11         |           |
| AH71         |           | HC27         |           |
| AH78         |           | TB45         |           |
| RM175        |           | AH115        |           |

Supplementary Table S1: Chemical structures of the Ru(II) arene complexes tested in this project
